# Supplementary material for: Genetic evidence for the origin of Aedes aegypti, the yellow fever mosquito, in the southwestern Indian Ocean
Source: PubMed Central journal article supplement (PMC7589284; doi:10.1111/mec.15590), 2020-08-30
Supplement: MEC-29-3593-s001.pdf [file MEC-29-3593-s001.pdf]

# Supplemental Text, Figures, and Tables for “Genetic evidence for the origin of *Aedes aegypti*, the yellow fever mosquito, in the southwestern Indian Ocean”

John Soghigian <sup>1,2\*</sup>, Andrea Gloria-Soria <sup>1,3</sup>, Vincent Robert <sup>4</sup>, Gilbert Le Goff <sup>4</sup>, Anna-Bella Failloux <sup>5</sup>, Jeffrey R. Powell<sup>1</sup>

<sup>1</sup> Yale University, 21 Schem Street, New Haven, CT 06520-8105 USA

<sup>2</sup> Department of Entomology and Plant Pathology, North Carolina State University, Raleigh, NC, 27603

<sup>3</sup> Center for Vector Biology & Zoonotic Diseases. Department of Environmental Sciences. The Connecticut Agricultural Experiment Station. 123 Huntington St., New Haven, CT 06504

<sup>4</sup> MIVEGEC Unit, IRD, Montpellier Univ., CNRS, Montpellier, France

<sup>5</sup> Institut Pasteur, Arboviruses and Insect Vectors, 25 rue du Dr Roux, F-75724, Paris, France

\*Corresponding Author : [john.soghigian@gmail.com](mailto:john.soghigian@gmail.com)

## Contents

|                           |    |
|---------------------------|----|
| Supplemental Text .....   | 2  |
| Supplemental Figures..... | 3  |
| Figure S1 .....           | 4  |
| Figure S2.....            | 6  |
| Figure S3.....            | 7  |
| Figure S4.....            | 8  |
| Figure S5.....            | 9  |
| Supplemental Tables.....  | 10 |
| Table S1 .....            | 10 |
| Table S2 .....            | 11 |
| Table S3 .....            | 12 |
| Table S4 .....            | 13 |
| Table S5 .....            | 14 |
| Table S6 .....            | 15 |
| Table S7 .....            | 16 |
| Table S8 .....            | 17 |
| Table S9 .....            | 18 |
| Table S10 .....           | 19 |
| Table S11 .....           | 20 |
| Table S12 .....           | 21 |
| Table S13 .....           | 22 |
| Table S14 .....           | 23 |
| Table S15 .....           | 25 |
| Table S16 .....           | 28 |
| Table S17 .....           | 29 |

## Supplemental Text

### *Missing Data*

As we overrode default settings for missing data in order to call SNPs for *Aedes pia*, we also investigated the association between missing data and population differentiation.

### **Analysis of Missing Data**

We calculated the proportion of missing data per individual from each population (or species for *Aedes pia* and *Aedes mascarensis*). We tested whether there was a significant difference among populations in amount of missing data with an ANOVA, and then used a Tukey's HSD to assess where significant differences occurred in R.

### **Results of Missing Data Analysis**

The amount of missing data present per population showed additional signs of the distinctiveness – and potential admixture – of island populations, when genotyped on the SNP chip designed for *Ae. aegypti* s.s. (Figure S5). We expect the efficiency of the probes designed for *Ae. aegypti* s.s. to decline with the genetic distance of the species being tested given the probes were designed from genomic sequencing of *Aedes aegypti aegypti*.

There was a significant difference in missing data among populations ( $F_{18,180}=122.2$ ,  $P<0.001$ ; Table S17), but this missing data difference was only significant among divergent sibling species and island populations (Fig S5). Moreover, the proportion of missing data is consistent with approximate genetic distance in our phylogenetic analyses (Figure 4); populations more distant from *Aaa/Aaf* have proportionally more missing data, with the greatest missing data observed in *Ae. pia*, followed by *Ae. mascarensis* and *Aedes aegypti* from Madagascar. Furthermore, the island populations of Reunion and Mayotte appear to be intermediates between *Ae. mascarensis*, *Ae. aegypti* from Madagascar, and *Ae. aegypti* s.s.; this higher proportion of missing data could thus be a result of admixture, an observation consistent with our SNMF (Figure S4) and our tests of admixture in Treemix.

## **Supplemental Figures**

Figure S1

A: ML phylogeny tree based on all seven nucleotide markers

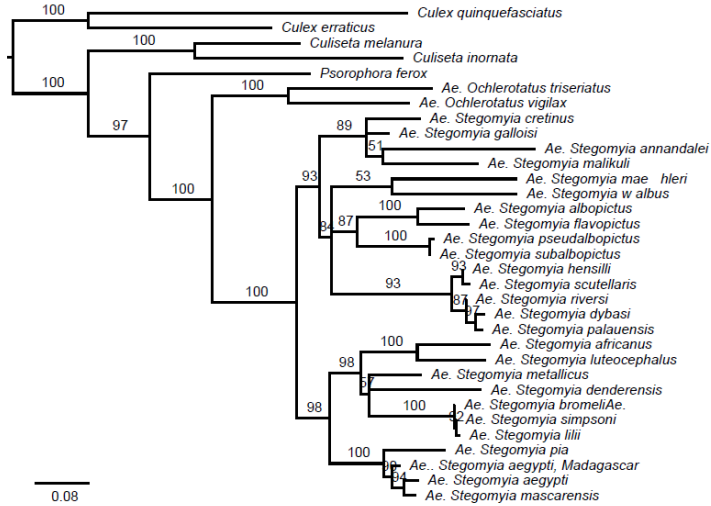

B: ML phylogeny based on mitochondrial markers

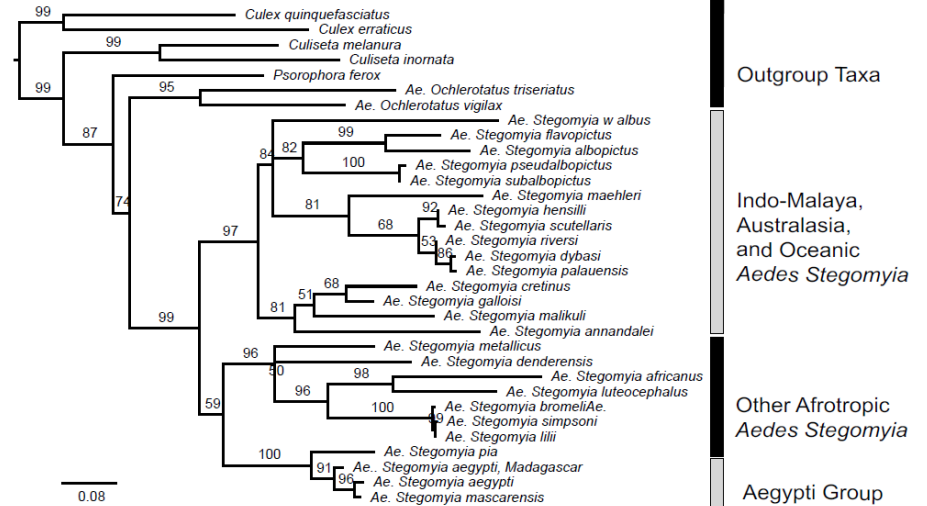

C: ML phylogeny based on nuclear markers

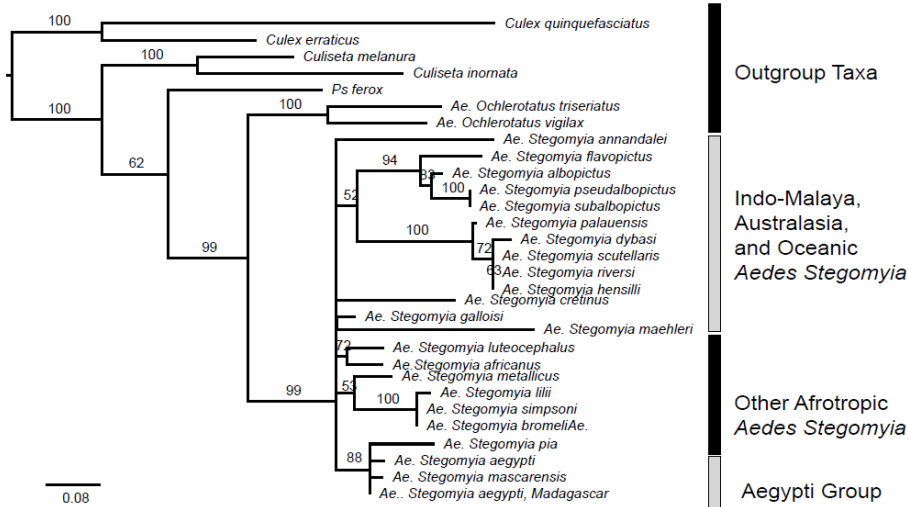

D: Cladogram based on SNP dataset, from Fig 4

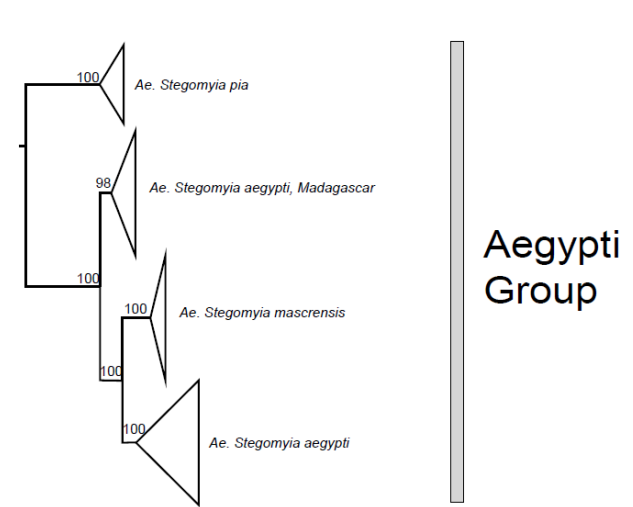

Fig S1. Maximum likelihood phylogenetic analyses in IQ-Tree recover concordant topologies for clades with high support values across A) the full seven marker nucleotide dataset, B) the nucleotide dataset subset to mitochondrial markers alone, C) the nucleotide dataset subset to nuclear markers alone, and D) the 18,849 SNP dataset, represented here as a cladogram of relationships between species in the Aegypti Group, from Figure 4 in the main manuscript text. Branch lengths are not to scale in Panel D (see Figure 4 in main manuscript text). Branch support values are UFBoot values from IQ-Tree. Branches collapsed at extremely poorly supported nodes for comparison (<50).

Figure S2

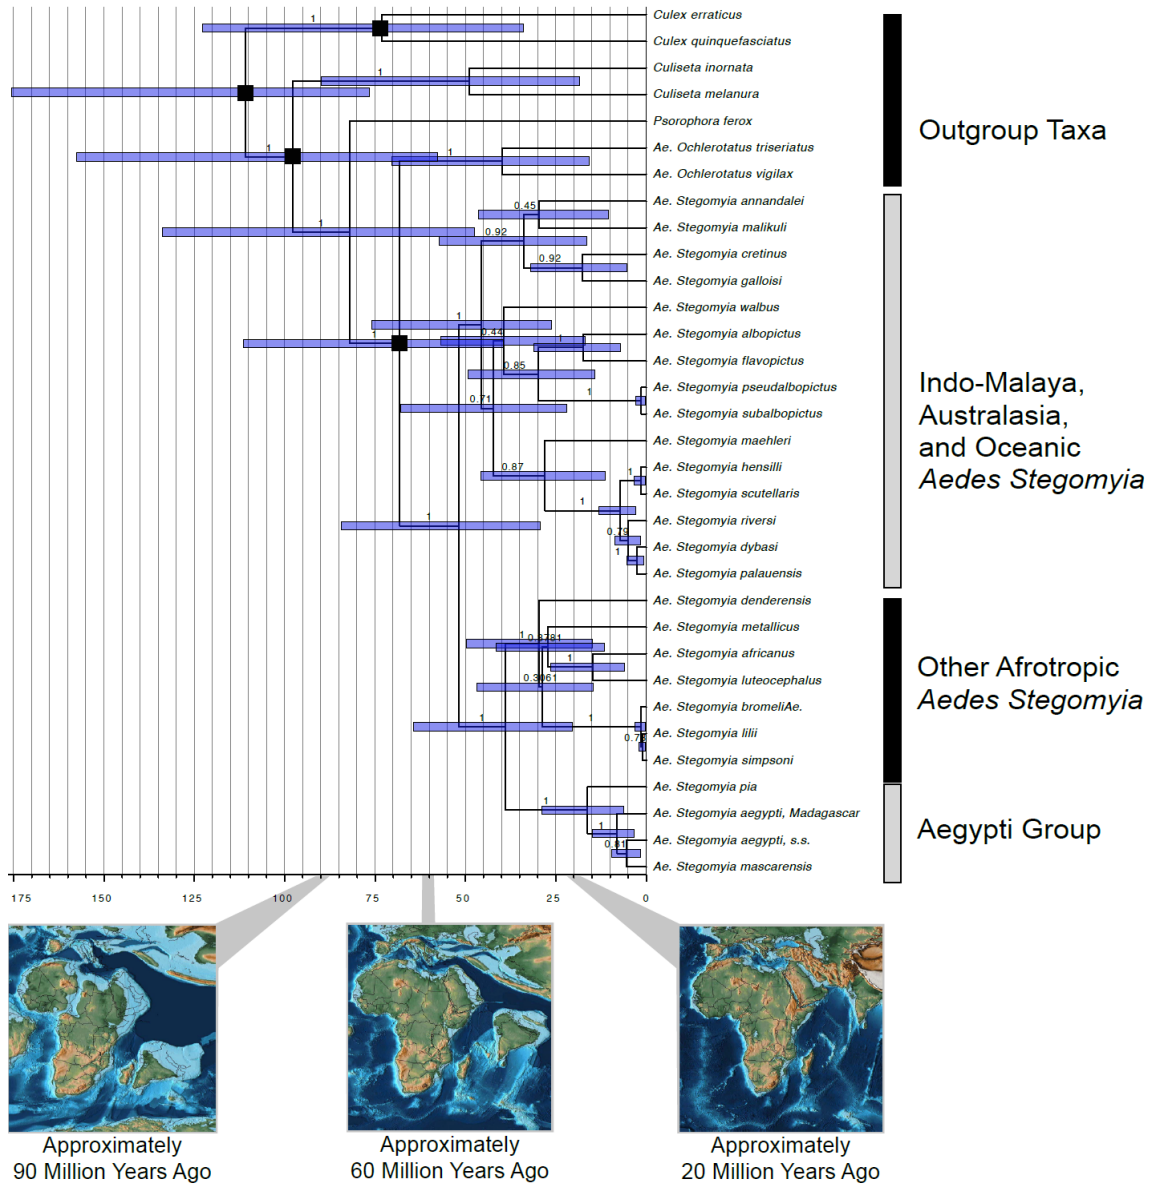

Fig. S2. Full analysis of divergence times in the subgenus *Stegomyia* from the seven marker nucleotide dataset in BEAST2. Values on branches are posterior probabilities. Bars indicate 95% HPDs. Black boxes indicate the location of fossil-based constraints; see Supplementary Table 6 for more information.

Figure S3

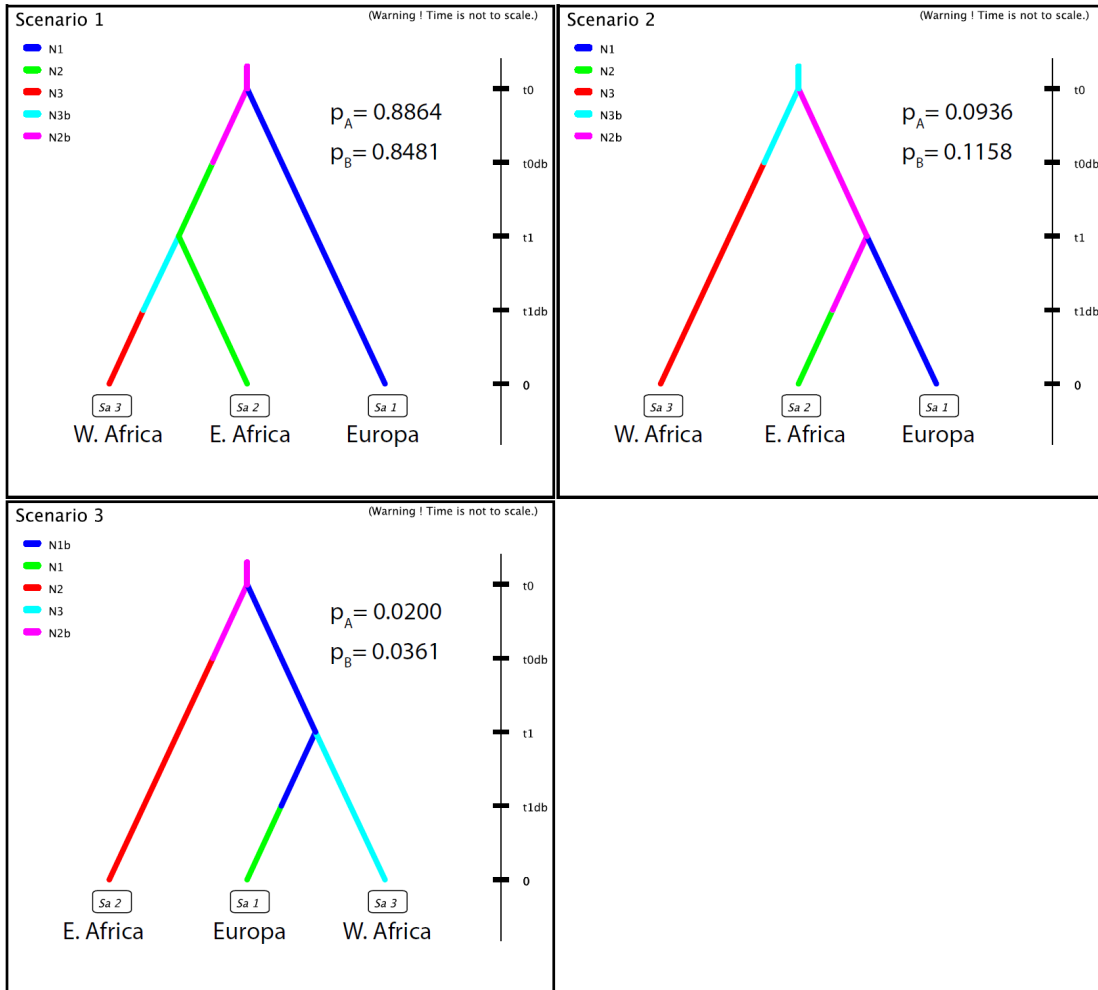

Fig. S3. Visual depiction of the approximate Bayesian computation (ABC) analyses across two runs (a and b) with separate populations from East and West Africa in each of the runs. Across runs, the best-supported scenario was Scenario 1, where Europa diverged prior to Africa. See Supplemental Table 1 and 2 for additional details on these results.

Figure S4

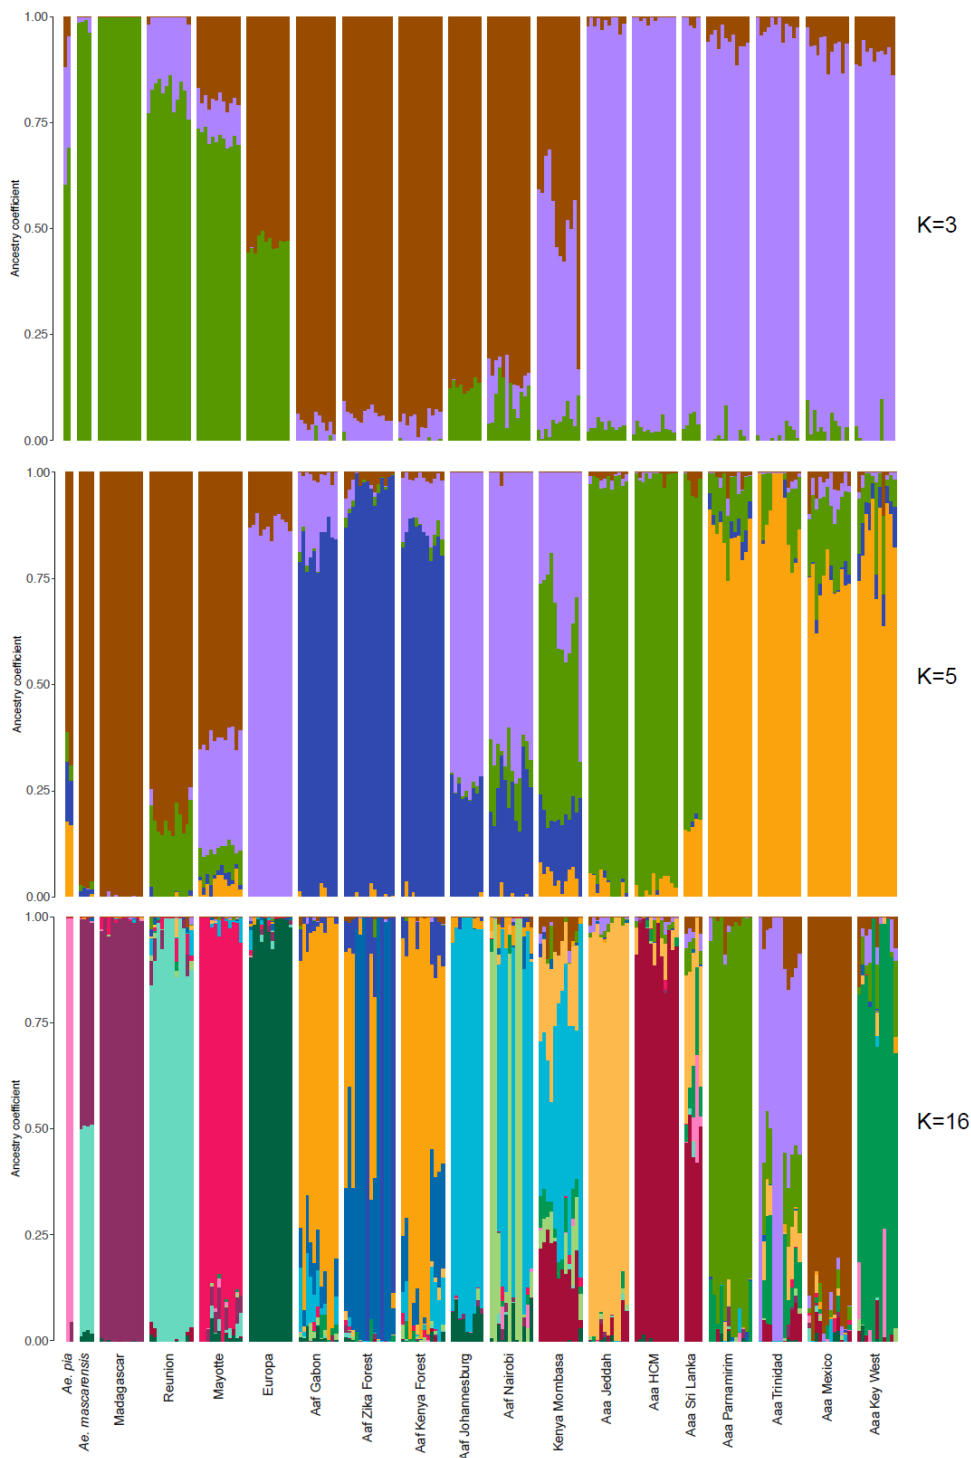

Fig. S4. STRUCTURE-like SNMF analysis of the Aegypti Group SNP dataset demonstrates differentiation among subspecies of *Aedes aegypti* and the islands in the southwestern Indian Ocean.



Figure S5

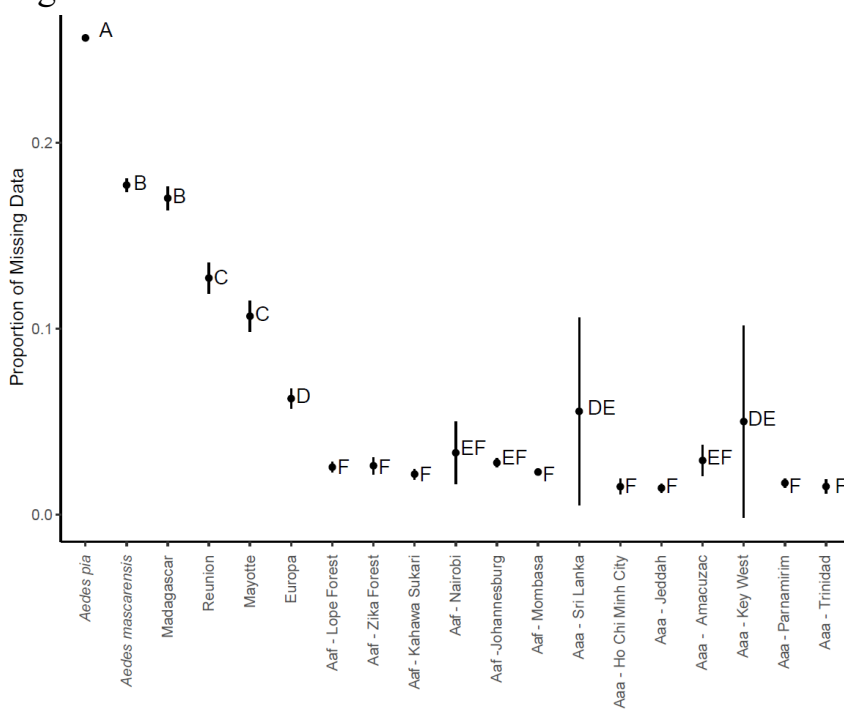

Fig. S5. *Aedes aegypti* from Madagascar appear as distant as *Aedes mascarensis* from *Aedes aegypti* s.s., with regards to missing data. Putatively admixed populations show intermediate levels of missing data. Mean missing data in the Aegypti Group SNP dataset for each population and subspecies. Error bars are standard errors and different letters are significantly different from one another according to a posthoc Tukey's HSD (see Supplemental Tables).

## Supplemental Tables

Table S1: Geographic sampling location of species and populations of *Aedes aegypti* used in this study.

| Subspecies/Region           | Geographic Sampling Location | N  | Year Sampled* | Originating Study            |
|-----------------------------|------------------------------|----|---------------|------------------------------|
| <i>Ae. mascarensis</i>      | Mauritius                    | 4  |               | see Kotsakiozi et al. 2018   |
| <i>Ae. pia</i>              | Mayotte                      | 2  | 2011          | This study                   |
| <i>Ae. aegypti aegypti</i>  | Ho Chi Min, Vietnam          | 12 |               | see Gloria-Soria et al. 2018 |
| <i>Ae. aegypti aegypti</i>  | Jeddah, Saudi Arabia         | 11 |               | see Gloria-Soria et al. 2018 |
| <i>Ae. aegypti aegypti</i>  | Amacuzac, Mexico             | 12 |               | see Gloria-Soria et al. 2018 |
| <i>Ae. aegypti aegypti</i>  | Key West, Florida            | 11 |               | see Gloria-Soria et al. 2018 |
| <i>Ae. aegypti aegypti</i>  | Parnamirim, Brazil           | 12 | 2012          | This study                   |
| <i>Ae. aegypti aegypti</i>  | Sri Lanka                    | 5  |               | see Gloria-Soria et al. 2018 |
| <i>Ae. aegypti aegypti</i>  | Trinidad                     | 12 |               | see Gloria-Soria et al. 2018 |
| <i>Ae. aegypti formosus</i> | Lope Forest, Gabon           | 12 |               | see Kotsakiozi et al. 2018   |
| <i>Ae. aegypti formosus</i> | Kahawa Sukari, Kenya         | 12 |               | see Kotsakiozi et al. 2018   |
| <i>Ae. aegypti formosus</i> | Mombasa, Kenya               | 12 | 2017          | This study                   |
| <i>Ae. aegypti formosus</i> | Nairobi, Kenya               | 12 |               | see Kotsakiozi et al. 2018   |
| <i>Ae. aegypti formosus</i> | Zika Forest, Uganda          | 14 |               | see Kotsakiozi et al. 2018   |
| <i>Ae. aegypti formosus</i> | Johannesburg, South Africa   | 9  |               | see Gloria-Soria et al. 2018 |
| <i>Ae. aegypti</i> - Island | Europa                       | 12 | 2008          | This study                   |
| <i>Ae. aegypti</i> - Island | Mahaleja, Madagascar         | 12 | 2011          | This study                   |
| <i>Ae. aegypti</i> - Island | Mayotte                      | 12 | 2011          | This study                   |
| <i>Ae. aegypti</i> - Island | Reunion                      | 12 |               | see Kotsakiozi et al. 2018   |

\*Listed for this study. See publishing study for additional informational on previously published samples.

Table S2: Presence, indicated by X, and absence of markers, per taxon, in our nucleotide sequence alignments. Species groups within the subgenus *Stegomyia* are indicated. Members of the Aegypti Group are bolded. Taxa with \* are newly sequenced for this study.

| Species                                           | <i>Stegomyia</i> Group <sup>a</sup> | 18S      | 28S      | Arginine Kinase | COI      | COII     | Enolase  | ITS2     |
|---------------------------------------------------|-------------------------------------|----------|----------|-----------------|----------|----------|----------|----------|
| <i>Ae. Ochlerotatus triseriatus</i> *             |                                     | X        | X        | X               | X        | X        | X        | X        |
| <i>Ae. Ochlerotatus vigilax</i> *                 |                                     | X        | X        | X               | X        | X        | X        |          |
| <b><i>Ae. Stegomyia aegypti</i></b>               | <b>Aegypti</b>                      | <b>X</b> | <b>X</b> | <b>X</b>        | <b>X</b> | <b>X</b> | <b>X</b> | <b>X</b> |
| <b><i>Ae. Stegomyia 'aegypti' Madagascar</i>*</b> | <b>Aegypti</b>                      | <b>X</b> | <b>X</b> | <b>X</b>        | <b>X</b> | <b>X</b> |          | <b>X</b> |
| <i>Ae. Stegomyia albopictus</i>                   | Albopictus <sup>b</sup>             | X        | X        | X               | X        | X        | X        | X        |
| <i>Ae. Stegomyia annandalei</i>                   | Annandalei <sup>c</sup>             |          | X        |                 | X        | X        |          |          |
| <i>Ae. Stegomyia bromeliae</i>                    | Simpsoni                            | X        | X        | X               | X        |          | X        | X        |
| <i>Ae. Stegomyia cretinus</i>                     | Unilineatus                         |          |          |                 | X        |          |          | X        |
| <i>Ae. Stegomyia denderensis</i>                  | Apicoargenteus                      |          |          |                 | X        |          |          |          |
| <i>Ae. Stegomyia dybasi</i>                       | Scutellaris <sup>b</sup>            |          | X        |                 | X        |          |          |          |
| <i>Ae. Stegomyia flavopictus</i>                  | Albopictus <sup>b</sup>             |          | X        |                 | X        |          |          | X        |
| <i>Ae. Stegomyia galloisi</i>                     | Albopictus <sup>b</sup>             |          | X        |                 | X        |          |          |          |
| <i>Ae. Stegomyia hensilli</i>                     | Scutellaris <sup>b</sup>            |          | X        |                 | X        |          |          |          |
| <i>Ae. Stegomyia lili</i>                         | Simpsoni                            |          |          |                 | X        |          |          | X        |
| <i>Ae. Stegomyia luteocephalus</i>                | Africanus                           | X        | X        | X               | X        | X        | X        | X        |
| <i>Ae. Stegomyia maehleri</i>                     | Maehleri                            |          | X        |                 | X        |          |          |          |
| <i>Ae. Stegomyia malikuli</i>                     | Meiopunctatus <sup>c</sup>          |          |          |                 | X        | X        |          |          |
| <b><i>Ae. Stegomyia mascarensis</i></b>           | <b>Aegypti</b>                      | <b>X</b> | <b>X</b> | <b>X</b>        | <b>X</b> | <b>X</b> | <b>X</b> | <b>X</b> |
| <i>Ae. Stegomyia metallicus</i>                   | Metallicus                          | X        | X        | X               | X        |          | X        | X        |
| <i>Ae. Stegomyia palauensis</i>                   | Scutellaris <sup>b</sup>            |          | X        |                 | X        |          |          |          |
| <b><i>Ae. Stegomyia pia</i></b>                   | <b>Aegypti</b>                      | <b>X</b> | <b>X</b> |                 | <b>X</b> |          |          | <b>X</b> |
| <i>Ae. Stegomyia pseudalbopictus</i>              | Albopictus <sup>b</sup>             |          | X        |                 | X        |          |          |          |
| <i>Ae. Stegomyia riversi</i>                      | Scutellaris <sup>b</sup>            |          | X        |                 | X        |          |          | X        |
| <i>Ae. Stegomyia scutellaris</i>                  | Scutellaris <sup>b</sup>            |          | X        | X               | X        |          |          |          |
| <i>Ae. Stegomyia simpsoni</i>                     | Simpsoni                            |          |          | X               | X        |          |          | X        |
| <i>Ae. Stegomyia subalbopictus</i>                | Albopictus <sup>b</sup>             |          | X        | X               | X        | X        |          |          |
| <i>Ae. Stegomyia w-albus</i>                      | W-albus <sup>c</sup>                |          |          |                 | X        |          |          |          |
| <i>Ae. Stegomyia africanus</i>                    | Africanus                           | X        | X        | X               | X        |          | X        |          |
| <i>Culex erraticus</i> *                          |                                     | X        | X        | X               | X        | X        | X        | X        |
| <i>Culex quinquefasciatus</i>                     |                                     | X        | X        | X               | X        | X        | X        | X        |
| <i>Culiseta inornate</i> *                        |                                     | X        | X        | X               | X        | X        | X        | X        |
| <i>Culiseta melanura</i> *                        |                                     | X        | X        | X               | X        | X        |          | X        |
| <i>Psorophora ferox</i>                           |                                     | X        | X        | X               | X        | X        | X        | X        |

a: The Species Group to which each *Stegomyia* species belongs, following the Mosquito Taxonomic Inventory (<http://mosquito-taxonomic-inventory.info/>, retrieved 6/1/2020).

b: Albopictus and Scutellaris are subgroups of the Scutellaris group.

c: Annandalei, Meiopunctatus, and W-albus are subgroups of the W-albus group.

Table S3: Marker name and primer sequences (5' to 3') used to amplify nucleotide sequence data reported here. The original source reference for each primer is provided here, and see Soghigian et al. 2017 for additional details.

| Marker                                | Primer sequence                                                 | Reference              |
|---------------------------------------|-----------------------------------------------------------------|------------------------|
| 18S - Small Ribosomal Subunit         | F- GTTGAGTCAAATTAAGCCGC<br>R - CTGCCCTATCAACTATTGATGG           | Soghigian et al. 2017  |
| 28S - Large Ribosomal Subunit         | F- GGAGTCGTGTTGCTTGATA<br>R - CCAGCTACTAGATGGTTCG               | Soghigian et al. 2017  |
| Arginine Kinase                       | F – GCTTCAAGAAGACCGACAAGCAC<br>R – GCCATCGTACATCTCCTTGACG       | Reidenbach et al. 2009 |
| COI - Cytochrome Oxidase Subunit I    | F - GGTCAACAAATCATAAAGATATTGG<br>R – TAAACTTCAGGGTGACCAAAAAATCA | Folmer et al. 1994     |
| COII - Cytochrome Oxidase Subunit II  | F - ATGGCAGATTAGTGCAATGA<br>R - GTTTAAGAGACCAGTACTTG            | Cook et al. 2005       |
| Enolase                               | F - AGRATYTGTTGTACTTGGC<br>R - ATGCAGGAGTTCATGATCCTG            | Reidenbach et al. 2009 |
| ITS2 - Internal Transcribed Spacer II | F – TGTGAACTGCAGGACACATG<br>R - TCACACATTATTTGAGGCCTAC          | Wesson et al. 1992     |

Table S4: A nested analysis of molecular variance (AMOVA) using species/subspecies and population of origin.

|                                           | Df  | Sum of Squares | Mean Square | Perc. Var.* | P-value** |
|-------------------------------------------|-----|----------------|-------------|-------------|-----------|
| Between subspecies/species                | 3   | 123669.19      | 41223.06    | 32.65       | 0.001     |
| Among samples within a subspecies/species | 15  | 93957.36       | 6263.82     | 19.45       | 0.001     |
| Within samples                            | 180 | 210852.05      | 1171.40     | 47.90       | 0.001     |
| Total                                     | 198 | 428478.60      | 2164.03     |             |           |

\*Percent of variance (out of 100) refers to the proportion of variance attributed to that component in the AMOVA

\*\*P-value calculated from a randomization test with 999 permutations.

---

Table S5: Pairwise Fst values among regions included in this study

|                        | Aaa  | Aaf  | Islands | <i>Ae. pia</i> |
|------------------------|------|------|---------|----------------|
| <i>Ae. mascarensis</i> | 0.38 | 0.28 | 0.14    | 0.53           |
| <i>Ae. pia</i>         | 0.39 | 0.36 | 0.39    |                |
| Islands                | 0.32 | 0.17 |         |                |
| Aaf                    | 0.22 |      |         |                |

All pairwise Fst values are significant ( $P < 0.05$ ). For populations included in Islands, Aaf, and Aaa categories, see Table 1.

Table S6: Pairwise Fst values among populations

|                                | 1    | 2    | 3    | 4    | 5    | 6    | 7    | 8    | 9    | 10   | 11   | 12   | 13   | 14   | 15   | 16   | 17   | 18   |
|--------------------------------|------|------|------|------|------|------|------|------|------|------|------|------|------|------|------|------|------|------|
| 1. <i>Ae. mascarensis</i>      |      |      |      |      |      |      |      |      |      |      |      |      |      |      |      |      |      |      |
| 2. <i>Ae. pia</i>              | 0.53 |      |      |      |      |      |      |      |      |      |      |      |      |      |      |      |      |      |
| 3. Europa                      | 0.56 | 0.63 |      |      |      |      |      |      |      |      |      |      |      |      |      |      |      |      |
| 4. Lope Forest, Gabon          | 0.39 | 0.43 | 0.36 |      |      |      |      |      |      |      |      |      |      |      |      |      |      |      |
| 5. Ho Chi Min, Vietnam         | 0.48 | 0.45 | 0.52 | 0.35 |      |      |      |      |      |      |      |      |      |      |      |      |      |      |
| 6. Jeddah, Saudi Arabia        | 0.50 | 0.47 | 0.54 | 0.36 | 0.12 |      |      |      |      |      |      |      |      |      |      |      |      |      |
| 7. Kahawa Sukari, Kenya        | 0.37 | 0.42 | 0.34 | 0.06 | 0.34 | 0.35 |      |      |      |      |      |      |      |      |      |      |      |      |
| 8. Mombasa, Kenya              | 0.33 | 0.34 | 0.33 | 0.16 | 0.17 | 0.17 | 0.15 |      |      |      |      |      |      |      |      |      |      |      |
| 9. Nairobi, Kenya              | 0.36 | 0.41 | 0.29 | 0.14 | 0.34 | 0.35 | 0.13 | 0.11 |      |      |      |      |      |      |      |      |      |      |
| 10. Madagascar                 | 0.34 | 0.57 | 0.54 | 0.44 | 0.55 | 0.57 | 0.42 | 0.40 | 0.41 |      |      |      |      |      |      |      |      |      |
| 11. Mayotte                    | 0.21 | 0.38 | 0.33 | 0.25 | 0.37 | 0.39 | 0.24 | 0.21 | 0.21 | 0.22 |      |      |      |      |      |      |      |      |
| 12. Amacuzac, Mexico           | 0.46 | 0.43 | 0.51 | 0.33 | 0.16 | 0.17 | 0.31 | 0.17 | 0.32 | 0.53 | 0.36 |      |      |      |      |      |      |      |
| 13. Key West, Florida          | 0.45 | 0.40 | 0.49 | 0.30 | 0.14 | 0.16 | 0.29 | 0.15 | 0.30 | 0.52 | 0.34 | 0.11 |      |      |      |      |      |      |
| 14. Parmir, Brazil             | 0.49 | 0.46 | 0.53 | 0.34 | 0.16 | 0.17 | 0.33 | 0.18 | 0.34 | 0.55 | 0.38 | 0.14 | 0.11 |      |      |      |      |      |
| 15. Reunion Island             | 0.22 | 0.45 | 0.49 | 0.37 | 0.40 | 0.41 | 0.35 | 0.28 | 0.34 | 0.36 | 0.22 | 0.39 | 0.38 | 0.41 |      |      |      |      |
| 16. Johannesburg, South Africa | 0.43 | 0.47 | 0.32 | 0.16 | 0.39 | 0.41 | 0.16 | 0.15 | 0.05 | 0.47 | 0.24 | 0.37 | 0.35 | 0.39 | 0.39 |      |      |      |
| 17. Sri Lanka                  | 0.52 | 0.42 | 0.58 | 0.35 | 0.09 | 0.11 | 0.33 | 0.15 | 0.33 | 0.59 | 0.37 | 0.15 | 0.13 | 0.15 | 0.41 | 0.40 |      |      |
| 18. Trinidad                   | 0.50 | 0.47 | 0.54 | 0.36 | 0.17 | 0.18 | 0.34 | 0.20 | 0.35 | 0.56 | 0.39 | 0.14 | 0.12 | 0.13 | 0.43 | 0.41 | 0.16 |      |
| 19. Zika Forest, Uganda        | 0.39 | 0.43 | 0.37 | 0.06 | 0.35 | 0.36 | 0.05 | 0.18 | 0.17 | 0.43 | 0.27 | 0.33 | 0.30 | 0.34 | 0.37 | 0.20 | 0.35 | 0.35 |

Table S7: The top 5 Admixture Scenarios For Mombasa, Mayotte, and Reunion, sorted by z score, from the full dataset. Top hit for each admixed population is bolded for comparison, but all listed scenarios have a high probability

| Pop                  | Anc1                            | Anc2                     | F3     | std_error       | z             | P-value          |
|----------------------|---------------------------------|--------------------------|--------|-----------------|---------------|------------------|
| <b>Kenya_Mombasa</b> | <b>SAfrica_Johannesburg</b>     | <b>Jeddah</b>            | -0.020 | <b>4.89E-04</b> | <b>-41.77</b> | <b>0</b>         |
| Kenya_Mombasa        | Ho_Chi_Minh_City                | SAfrica_Johannesburg     | -0.020 | 4.81E-04        | -41.59        | 0                |
| Kenya_Mombasa        | Sri_Lanka                       | SAfrica_Johannesburg     | -0.020 | 4.91E-04        | -40.63        | 0                |
| Kenya_Mombasa        | Kenya_Nairobi                   | Jeddah                   | -0.016 | 4.23E-04        | -37.99        | 0                |
| Kenya_Mombasa        | Ho_Chi_Minh_City                | Kenya_Nairobi            | -0.016 | 4.16E-04        | -37.63        | 0                |
| <b>Mayotte</b>       | <b>Madagascar</b>               | <b>Jeddah</b>            | -0.013 | <b>6.04E-04</b> | <b>-21.35</b> | <b>5.58E-101</b> |
| Mayotte              | Madagascar                      | Ho_Chi_Minh_City         | -0.013 | 6.06E-04        | -21.25        | 3.88E-100        |
| Mayotte              | Madagascar                      | Kenya_Mombasa            | -0.010 | 4.65E-04        | -20.53        | 1.64E-93         |
| Mayotte              | Madagascar                      | Sri_Lanka                | -0.012 | 6.02E-04        | -19.88        | 7.71E-88         |
| Mayotte              | North_KeyWest                   | Madagascar               | -0.011 | 5.80E-04        | -19.71        | 2.30E-86         |
| <b>Reunion</b>       | <b><i>Aedes_mascarensis</i></b> | <b>Jeddah</b>            | -0.007 | <b>7.31E-04</b> | <b>-10.09</b> | <b>6.36E-24</b>  |
| Reunion              | <i>Aedes_mascarensis</i>        | Ho_Chi_Minh_City         | -0.007 | 7.33E-04        | -9.43         | 4.37E-21         |
| Reunion              | Sri_Lanka                       | <i>Aedes_mascarensis</i> | -0.006 | 7.43E-04        | -8.32         | 9.42E-17         |
| Reunion              | <i>Aedes_mascarensis</i>        | Parnamirim               | -0.005 | 7.43E-04        | -7.19         | 6.89E-13         |
| Reunion              | <i>Aedes_mascarensis</i>        | Mexico_Amacuzac          | -0.005 | 7.19E-04        | -7.07         | 1.61E-12         |



Table S8: The top 5 Admixture Scenarios For Mombasa, Mayotte, and Reunion, sorted by z score, from the SNP dataset filtered for completeness. Top hit for each admixed population is bolded for comparison, but all listed scenarios have a high probability.

| Pop                  | Anc1                     | Anc2                 | F3            | std_error    | z              | P-value         |
|----------------------|--------------------------|----------------------|---------------|--------------|----------------|-----------------|
| <b>Kenya_Mombasa</b> | <b>Kenya_Nairobi</b>     | <b>Jeddah</b>        | <b>-0.015</b> | <b>0.001</b> | <b>-21.250</b> | <b>3.19E-99</b> |
| Kenya_Mombasa        | Sri_Lanka                | Kenya_Nairobi        | -0.015        | 0.001        | -18.581        | 3.18E-76        |
| Kenya_Mombasa        | Sri_Lanka                | SAfrica_Johannesburg | -0.019        | 0.001        | -17.678        | 3.78E-69        |
| Kenya_Mombasa        | Ho_Chi_Minh_City         | SAfrica_Johannesburg | -0.018        | 0.001        | -15.480        | 2.04E-53        |
| Kenya_Mombasa        | Ho_Chi_Minh_City         | Kenya_Nairobi        | -0.014        | 0.001        | -15.061        | 1.23E-50        |
| <b>Mayotte</b>       | <b>Madagascar</b>        | <b>Jeddah</b>        | <b>-0.011</b> | <b>0.002</b> | <b>-6.867</b>  | <b>9.68E-12</b> |
| Mayotte              | Madagascar               | Mexico_Amacuzac      | -0.009        | 0.001        | -6.284         | 4.63E-10        |
| Mayotte              | Madagascar               | Ho_Chi_Minh_City     | -0.010        | 0.002        | -6.101         | 1.46E-09        |
| Mayotte              | Madagascar               | Sri_Lanka            | -0.010        | 0.002        | -6.093         | 1.53E-09        |
| Mayotte              | Madagascar               | Trinidad             | -0.009        | 0.002        | -5.920         | 4.38E-09        |
| <b>Reunion</b>       | <b>Aedes_mascarensis</b> | <b>Jeddah</b>        | <b>-0.010</b> | <b>0.002</b> | <b>-4.921</b>  | <b>1.05E-06</b> |
| Reunion              | Sri_Lanka                | Aedes_mascarensis    | -0.009        | 0.002        | -4.763         | 2.30E-06        |
| Reunion              | Aedes_mascarensis        | Ho_Chi_Minh_City     | -0.009        | 0.002        | -4.562         | 5.96E-06        |
| Reunion              | Aedes_mascarensis        | Parnamirim           | -0.008        | 0.002        | -4.343         | 1.62E-05        |

Table S9: The top 5 Admixture Scenarios For Mombasa, Mayotte, and Reunion, where we resampled *Ae. aegypti* populations down to 4 individuals each 100 times. Top hit for each admixed population is bolded for comparison, but all listed scenarios have a high probability. This table is sorted by F3 score.

| Pop                  | Anc1             | Anc2                        | F3            | Lower 95% Bound | Upper 95% Bound |
|----------------------|------------------|-----------------------------|---------------|-----------------|-----------------|
| <b>Kenya_Mombasa</b> | <b>Jeddah</b>    | <b>SAfrica_Johannesburg</b> | <b>-0.008</b> | <b>-0.013</b>   | <b>-0.003</b>   |
| Kenya_Mombasa        | Ho_Chi_Minh_City | SAfrica_Johannesburg        | -0.008        | -0.013          | -0.003          |
| Kenya_Mombasa        | Jeddah           | Kenya_Nairobi               | -0.006        | -0.011          | -0.001          |
| Kenya_Mombasa        | Kenya_Nairobi    | Sri_Lanka                   | -0.005        | -0.009          | -0.001          |
| Kenya_Mombasa        | Ho_Chi_Minh_City | Kenya_Nairobi               | -0.005        | -0.010          | -0.001          |
| <b>Mayotte</b>       | <b>Jeddah</b>    | <b>Madagascar</b>           | <b>-0.003</b> | <b>-0.006</b>   | <b>0.000</b>    |
| Mayotte              | Ho_Chi_Minh_City | Madagascar                  | -0.002        | -0.005          | 0.001           |
| Mayotte              | Sri_Lanka        | Madagascar                  | -0.002        | -0.005          | 0.002           |
| Mayotte              | Mexico_Amacuzac  | Madagascar                  | -0.001        | -0.004          | 0.002           |
| Mayotte              | Parnamirim       | Madagascar                  | -0.001        | -0.004          | 0.002           |
| <b>Reunion</b>       | <b>Jeddah</b>    | <b>Aedes_mascarensis</b>    | <b>-0.004</b> | <b>-0.009</b>   | <b>0.000</b>    |
| Reunion              | Ho_Chi_Minh_City | Aedes_mascarensis           | -0.003        | -0.008          | 0.000           |
| Reunion              | Sri_Lanka        | Aedes_mascarensis           | -0.003        | -0.008          | 0.002           |
| Reunion              | Trinidad         | Aedes_mascarensis           | -0.002        | -0.007          | 0.002           |
| Reunion              | Parnamirim       | Aedes_mascarensis           | -0.002        | -0.007          | 0.003           |

Table S10: Alleles per  
microsatellite locus

| <b>Locus</b> | <b>Alleles</b> |
|--------------|----------------|
| AC1          | 19             |
| AC2          | 17             |
| AC4          | 9              |
| AC5          | 21             |
| CT2          | 13             |
| AG1          | 14             |
| AG2          | 10             |
| AG5          | 13             |
| A1           | 10             |
| A9           | 13             |
| B2           | 9              |
| B3           | 11             |
| TOTAL        | 159            |

Table S11: Microsatellite dataset characteristics, per population.

| <b>Population</b>                                       | <b>% Polymorphic Loci</b> | <b>% Missing data per locus</b> |
|---------------------------------------------------------|---------------------------|---------------------------------|
| Europa                                                  | 91.67%                    | 0                               |
| Ngari                                                   | 75.00%                    | %25 (AC4); 100% (A9)            |
| Cameroon                                                | 100.00%                   | 0                               |
| Gabon                                                   | 100.00%                   | 10% (A9)                        |
| BurkinaFaso                                             | 100.00%                   | 0                               |
| Dakar                                                   | 91.67%                    | 0                               |
| GuineaBissau                                            | 100.00%                   | 0                               |
| Lunyo                                                   | 100.00%                   | 10% (A9)                        |
| Bundibugyo                                              | 91.67%                    | 0                               |
| Kichwamba                                               | 100.00%                   | 0                               |
| Kisimu                                                  | 100.00%                   | 10% (AG2)                       |
| <b>Percentage of missing data across dataset: 1.02%</b> |                           |                                 |

Table S12: Microsatellite descriptive statistics per population.

| <b>Population</b>  | <b>Region</b> | <b>Ho</b> | <b>uHe</b> | <b>Fis</b> |
|--------------------|---------------|-----------|------------|------------|
| Europa             | SWIO          | 0.458     | 0.475      | 0.054      |
| Ngari              | West Africa   | 0.443     | 0.350      | -0.211     |
| Cameroon           | West Africa   | 0.558     | 0.711      | 0.201      |
| Gabon              | West Africa   | 0.639     | 0.710      | 0.061      |
| Burkina Faso       | West Africa   | 0.617     | 0.683      | 0.067      |
| Dakar              | West Africa   | 0.600     | 0.522      | -0.184     |
| GuineaBissau       | West Africa   | 0.617     | 0.671      | 0.087      |
| Lunyo, Uganda      | East Africa   | 0.675     | 0.591      | -0.187     |
| Bundibugyo, Uganda | East Africa   | 0.446     | 0.574      | 0.182      |
| Kichwamba, Uganda  | East Africa   | 0.542     | 0.624      | 0.099      |
| Kenya              | East Africa   | 0.646     | 0.716      | 0.080      |
| Total              |               | 0.567     | 0.602      | 0.028      |

**Ho:** observed heterozygosity

**uHe:** unbiased expected heterozygosity

**Fis:** fixation index

West Africa Ho= 0.579

East Africa Ho= 0.577

Table S13: Per population, per locus results for violation of Hardy-Weinberg Equilibrium from microsatellite data

| Population         | # Loci out of HWE | Loci out of HWE |
|--------------------|-------------------|-----------------|
| Europa             | 1                 | AG2             |
| Ngari              | 3                 | AC4, A9, B3     |
| Cameroon           | 1                 | B3              |
| Gabon              | 1                 | A1              |
| Burkina Faso       | 1                 | AG2             |
| Dakar              | 0                 |                 |
| GuineaBissau       | 1                 | A1              |
| Lunyo, Uganda      | 2                 | AG1, B3         |
| Bundibugyo, Uganda | 4                 | AC2, A1, B2, B3 |
| Kichwamba, Uganda  | 0                 |                 |
| Kenya              | 0                 |                 |

Table S14. Priors and posteriors (logistic approach) for the ABC analysis testing scenarios on the history of African *Aedes aegypti*

| Parameter                                | Details                                                                       | Prior | Posterior                                  |
|------------------------------------------|-------------------------------------------------------------------------------|-------|--------------------------------------------|
| Colonization scenarios:                  | <b>Scenario 1 –</b>                                                           | N/A   | <b>A) 0.8864</b><br><b>[0.8475,0.9253]</b> |
|                                          | <b>Europa <i>Ae. aegypti</i> to African <i>Ae. aegypti</i></b>                |       | <b>B) 0.8481</b><br><b>[0.8165,0.8798]</b> |
|                                          | A) Gabon (WA), Uganda (EA), Europa                                            |       |                                            |
| B) Burkina Faso (WA), Kenya (EA), Europa | Scenario 2–                                                                   | N/A   | A) 0.0936<br>[0.0000,0.3949]               |
|                                          | West African <i>Ae. aegypti</i> to Europa and East African <i>Ae. aegypti</i> |       | B) 0.1158<br>[0.0000,0.2896]               |
|                                          | Scenario 3 –                                                                  |       |                                            |
|                                          | East African <i>Ae. aegypti</i> to Europa and West African <i>Ae. aegypti</i> | N/A   | A) 0.0200<br>[0.0000,0.0551]               |
|                                          |                                                                               |       | B) 0.0361<br>[0.0000,0.2366]               |

### SCENARIO 1

|                           |             |                  |                                                                            |
|---------------------------|-------------|------------------|----------------------------------------------------------------------------|
| Effective population size | Europa      | 100 –<br>500,000 | A) 34,600 [19,700 –<br>55,300]<br><br>B) 36,300 [18,800 –<br>57,700]       |
|                           | West Africa | 100 –<br>500,000 | A) 378,000 [247,000 –<br>485,000]<br><br>B) 381,000 [255,000 –<br>485,000] |
|                           | East Africa | 100 –<br>500,000 | A) 233,000 [127,000 –<br>367,000]<br><br>B) 324,000 [184,000 –<br>471,000] |

|                         |                                                  |                                           |                                                                                                                                                                          |
|-------------------------|--------------------------------------------------|-------------------------------------------|--------------------------------------------------------------------------------------------------------------------------------------------------------------------------|
| <sup>1</sup> Split time | Africa from Europa                               | 10,000 –<br>1,000,000                     | A) 353,000 [97,800 –<br>797,000]<br><br>B) 396,000 [119,000 –<br>835,000]                                                                                                |
|                         | West Africa from East Africa                     | 10,000 –<br>1,000,000                     | A) 200,000 [78,100 –<br>372,000]<br><br>B) 249,000 [101,000 –<br>494,000]                                                                                                |
| Mutation rate           | Microsatellite –Stepwise Mutation<br>Model (SMM) | $9 \times 10^{-06}$ - $1 \times 10^{-05}$ | A) $9.47 \times 10^{-06}$ [ $9.05 \times 10^{-06}$<br>- $9.94 \times 10^{-06}$ ]<br><br>B) $9.46 \times 10^{-06}$ [ $9.04 \times 10^{-06}$<br>- $9.94 \times 10^{-06}$ ] |
| Confidence              | Type I error<br>(Simulated under scenario 1)     | N/A                                       | A) 0.124<br><br>B) 0.306                                                                                                                                                 |
|                         | Type II error<br>(Simulated under scenario 2)    | N/A                                       | A) 0.054<br><br>B) 0.188                                                                                                                                                 |
|                         | Type II error<br>(Simulated under scenario 3)    | N/A                                       | A) 0.074<br><br>B) 0.066                                                                                                                                                 |

<sup>1</sup> Time in generations (10 generations / year).

WA: West Africa

EA: East Africa



Table S15: Priors and posteriors (logistic approach) for the ABC analysis testing scenarios on the history of African *Aedes aegypti*. (Random sampled individuals from West Africa and East Africa pools).

| Parameter                 | Details                                                                       | Prior            | Posterior                                  |
|---------------------------|-------------------------------------------------------------------------------|------------------|--------------------------------------------|
| Colonization scenarios    | <b>Scenario 1 –</b>                                                           | N/A              | <b>A) 0.9199</b><br><b>[0.8967,0.9431]</b> |
| (3 independent replicas)  | <b>Europa <i>Ae. aegypti</i> to African <i>Ae. aegypti</i></b>                |                  | <b>B) 0.9561</b><br><b>[0.9379,0.9744]</b> |
|                           | Scenario 2–                                                                   |                  | <b>C) 0.8764</b><br><b>[0.8359,0.9168]</b> |
|                           | West African <i>Ae. aegypti</i> to Europa and East African <i>Ae. aegypti</i> | N/A              | A) 0.0686<br>[0.0000,0.3338]               |
|                           |                                                                               |                  | B) 0.0372<br>[0.0000,0.4333]               |
|                           | Scenario 3 –                                                                  |                  | C) 0.1059<br>[0.0000,0.3903]               |
|                           | East African <i>Ae. aegypti</i> to Europa and West African <i>Ae. aegypti</i> | N/A              | A) 0.0115<br>[0.0000,0.3009]               |
|                           |                                                                               |                  | B) 0.0067<br>[0.0000,0.4193]               |
|                           |                                                                               |                  | C) 0.0177<br>[0.0000,0.3411]               |
| <b>SCENARIO 1</b>         |                                                                               |                  |                                            |
|                           | Europa                                                                        | 100 –<br>500,000 | A) 34,500 [19,900 –<br>54,300]             |
| Effective population size |                                                                               |                  | B) 29,200 [16,700 –<br>46,200]             |
|                           |                                                                               |                  | C) 32,700 [18,700 –<br>51,800]             |

|                         |                                                  |                                           |                                                                                                                                                                                                                                                 |
|-------------------------|--------------------------------------------------|-------------------------------------------|-------------------------------------------------------------------------------------------------------------------------------------------------------------------------------------------------------------------------------------------------|
|                         | West Africa                                      | 100 –<br>500,000                          | A) 333,000 [190,000 –<br>474,000]<br>B) 465,000 [412,000 –<br>497,000]<br>C) 364,000 [231,000 –<br>482,000]                                                                                                                                     |
|                         | East Africa                                      | 100 –<br>500,000                          | A) 412,000 [313,000 –<br>489,000]<br>B) 414,000 [315,000 –<br>489,000]<br>C) 399,000 [293,000 –<br>485,000]                                                                                                                                     |
| <sup>1</sup> Split time | Africa from Europa                               | 10,000 –<br>1,000,000                     | A) 408,000 [149,000 –<br>843,000]<br>B) 340,000 [112,000 –<br>792,000]<br>C) 332,000 [106,000 –<br>781,000]                                                                                                                                     |
|                         | West Africa from East Africa                     | 10,000 –<br>1,000,000                     | A) 221,000 [90,300 –<br>441,000]<br>B) 171,000 [67,400 –<br>358,000]<br>C) 206,000 [82,800 –<br>471,000]                                                                                                                                        |
| Mutation rate           | Microsatellite –Stepwise Mutation<br>Model (SMM) | $9 \times 10^{-06}$ - $1 \times 10^{-05}$ | A) $9.53 \times 10^{-06}$ [ $9.09 \times 10^{-06}$ - $9.99 \times 10^{-06}$ ]<br>B) $9.51 \times 10^{-06}$ [ $9.08 \times 10^{-06}$ - $9.98 \times 10^{-06}$ ]<br>C) $9.49 \times 10^{-06}$ [ $9.06 \times 10^{-06}$ - $9.95 \times 10^{-06}$ ] |
| Confidence              | Type I error                                     | N/A                                       | A) 0.256                                                                                                                                                                                                                                        |

|                              |     |          |
|------------------------------|-----|----------|
| (Simulated under scenario 1) |     | B) 0.260 |
|                              |     | C) 0.260 |
| Type II error                |     | A) 0.230 |
| (Simulated under scenario 2) | N/A | B) 0.220 |
|                              |     | C) 0.168 |
| Type II error                |     | A) 0.086 |
| (Simulated under scenario 3) |     | B) 0.096 |
|                              | N/A | C) 0.096 |

---

<sup>1</sup> Time in generations (10 generations / year).

**Table S16: Calibration information used in BEAST analyses**

| <b>Fossil For Node Calibration</b>                             | <b>Minimum age</b> | <b>Maximum age</b> | <b>Explanation</b>                                                                                                                                                                                                                                                                                                                                                                                                                                                                                                       |
|----------------------------------------------------------------|--------------------|--------------------|--------------------------------------------------------------------------------------------------------------------------------------------------------------------------------------------------------------------------------------------------------------------------------------------------------------------------------------------------------------------------------------------------------------------------------------------------------------------------------------------------------------------------|
| <i>Aedes (Ocherlotatus) serafini</i><br>Szadziewski 1998       | 33.9               | 123.87             | This fossil is an Eocene Baltic amber inclusion and was placed in <i>Ochlerotatus</i> , currently a subgenus of <i>Aedes</i> , by Szadziewski & Gilka, 2011. The uniform calibration corresponding to this fossil was placed at the common ancestor of <i>Aedes</i> mosquitoes in this analysis. The maximum age follows the maximum age of the common ancestor of <i>Aedes</i> in Reidenbach et al. 2009.                                                                                                               |
| <i>Culiseta kishenehn</i> Harbach & Greenwalt, 2012            | 46.2               | 218.81             | This compression fossil from the Kishenehn shale deposits in Montana was placed in an extinct subgenus within <i>Culiseta</i> by Harbach and Greenwalt, 2012. The uniform calibration corresponding to this fossil was placed at the common ancestor of <i>Culiseta</i> and the tribe Aedini. The maximum age follows the maximum age of the common ancestor of these two clades in Reidenbach et al. 2009.                                                                                                              |
| <i>Culex (Culex) erikae</i><br>Szadziewski & Szadziewska, 1985 | 33.9               | 218.81             | This fossil is an Eocene Baltic amber inclusion placed in the subgenus <i>Culex</i> for its close affinity to <i>Culex (Culex) pipiens</i> . The uniform calibration corresponding to this fossil was placed at the common ancestor of <i>Culex (Culex) quinquefasciatus</i> – a close relative of <i>Culex pipiens</i> – and <i>Culex (Neoculex) territans</i> . The maximum age constraint follows the maximum age of the common ancestor of the genus <i>Culex</i> and its nearest relative in Reidenbach et al. 2009 |
| <i>Paleoculicis minutus</i> Poinar et al 2000                  | 76.5               | 226.22             | This fossil male mosquito was reported by Poinar et al. 2000. The specimen was found in Canadian cretaceous amber in a formation ranging in age from 76.5 to 79.5 MYA. The aforementioned authors placed the specimen as in the Culicinae, but its affinities with tribes within the family is unknown (see Poinar et al. 2000 for a discussion). The maximum age is based off of Reidenbach et al. 2009.                                                                                                                |

Table S17: The analysis of variance comparing fraction of missing SNPs with population of origin for each sample.

|                   | Df  | Sum of Squares | Mean Squares | F-statistic | P-value |
|-------------------|-----|----------------|--------------|-------------|---------|
| <b>Population</b> | 18  | 0.54           | 0.03         | 122.2       | <2e-16  |
| <b>Residual</b>   | 180 | 0.04           | 0.00         |             |         |
